# Supplementary material for: MultiCapsNet: A General Framework for Data Integration and Interpretable Classification
Source: Front Genet. 2022 Jan 18;12:767602. doi: 10.3389/fgene.2021.767602 (PMC8652257; doi:10.3389/fgene.2021.767602)
Supplement: Supplementary file 2 [file DataSheet1.XLSX]

## Sheet: Table 1
Supplementary Table 1. The grouping of the 71 features
Feature	Grouping
disease_AML	Disease
disease_GST
disease_MPNST
disease_SCLC
disease_breast
disease_colorectal
disease_glioblastoma
disease_lymphoma
disease_melanoma
reviewer_1	Reviewer
reviewer_2
reviewer_3
reviewer_4
normal_VAF	Normal_pro
normal_depth
normal_other_bases_count
normal_ref_avg_basequality	Normal_ref
normal_ref_avg_clipped_length
normal_ref_avg_distance_to_effective_3p_end
normal_ref_avg_distance_to_q2_start_in_q2_reads
normal_ref_avg_mapping_quality
normal_ref_avg_num_mismaches_as_fraction
normal_ref_avg_pos_as_fraction
normal_ref_avg_se_mapping_quality
normal_ref_avg_sum_mismatch_qualities
normal_ref_count
normal_ref_num_minus_strand
normal_ref_num_plus_strand
normal_ref_num_q2_containing_reads
normal_var_avg_basequality	Normal_var
normal_var_avg_clipped_length
normal_var_avg_distance_to_effective_3p_end
normal_var_avg_distance_to_q2_start_in_q2_reads
normal_var_avg_mapping_quality
normal_var_avg_num_mismaches_as_fraction
normal_var_avg_pos_as_fraction
normal_var_avg_se_mapping_quality
normal_var_avg_sum_mismatch_qualities
normal_var_count
normal_var_num_minus_strand
normal_var_num_plus_strand
normal_var_num_q2_containing_reads
tumor_VAF	Tumor_pro
tumor_depth
tumor_other_bases_count
tumor_ref_avg_basequality	Tumor_ref
tumor_ref_avg_clipped_length
tumor_ref_avg_distance_to_effective_3p_end
tumor_ref_avg_distance_to_q2_start_in_q2_reads
tumor_ref_avg_mapping_quality
tumor_ref_avg_num_mismaches_as_fraction
tumor_ref_avg_pos_as_fraction
tumor_ref_avg_se_mapping_quality
tumor_ref_avg_sum_mismatch_qualities
tumor_ref_count
tumor_ref_num_minus_strand
tumor_ref_num_plus_strand
tumor_ref_num_q2_containing_reads
tumor_var_avg_basequality	Tumor_var
tumor_var_avg_clipped_length
tumor_var_avg_distance_to_effective_3p_end
tumor_var_avg_distance_to_q2_start_in_q2_reads
tumor_var_avg_mapping_quality
tumor_var_avg_num_mismaches_as_fraction
tumor_var_avg_pos_as_fraction
tumor_var_avg_se_mapping_quality
tumor_var_avg_sum_mismatch_qualities
tumor_var_count
tumor_var_num_minus_strand
tumor_var_num_plus_strand
tumor_var_num_q2_containing_reads

## Sheet: Tabel 2
Supplementary Table 2. The top 10 ranked cell type relevant TF/PPI identified by MultiCapsNet
Cell type	TOP10 TF/PPI(from 10th to 1st)
Cartilage cell	Pax5, Pax2, Pbx1,Foxa1,Mtf1, Nkx6-1, Foxa3, Foxa2, Foxm1, ppi_152, ppi_129
Dendritic cell	Fli1, Nr2f2, Nr2f1, Rxra, Cebpg, Nr1h2, Tp53, Gata3, ppi_172, Gata2, Gata1
Epithelial cell	Pparg, Foxl1, Nr3c1, ppi_187, Srf, Pou2f1, Rxra, Pax3, Hnf1a, ppi_76, Mef2a,
Kupffer cell	Nr2f2, Rxrb, Rxra, Nr1i2, Rarb, Rarg, Nr1h2, Nr1h3, Rara, Rxrg, ppi_172
Muscle cell	Pparg, Yy1, ppi_339, ppi_88, ppi_131, ppi_187, ppi_4, Fos, Hoxa7, ppi_280, Srf
Secretory alveoli cell	Max, Myc, ppi_305, ppi_32, Mef2a, Pgr, ppi_185, Nr3c1, ppi_33, ppi_67, ppi_261
Spermatocyte	ppi_153, ppi_305, ppi_91, ppi_104, ppi_24, ppi_295, ppi_252, Stat1, Stat3, Irf7, Topors

## Sheet: Tabel 3
Supplementary Table 3. The top 30 ranked cell type relevant TF identified by MultiCapsNet from mouse cortex and hippocampus dataset
With Labelling TF
Cell type	TOP30 TF (from 30th to 1st)
astrocytes_ependymal	Tef, Hes5, Atf3, Sox2, Rorb, Pbx1, Srebf2, Arnt2, Zic1, Elk3, Nfkb1, Pou3f2, Foxg1, Fli1, Stat6, Rfx3, Sox10, Bclaf1, Etv5, Sox9, Tead1, Gtf2f1, Irf1, Etv1, Hlf, Mef2c, Egr1, Sox8, Hcfc1, Ets1
endothelial-mural	Jun, Gata2, Nr3c1, Zic1, Yy1, Taf1, Erf, Gtf2f1, Prdm1, Tead1, Elk3, Nfe2l2, Egr4, Nfkb1, Stat6, Hcfc1, Fos, Etv1, Mef2c, Fosb, Fli1, Atf3, Elf1, Sox8, Bclaf1, Sox10, Sox9, Irf1, Egr1, Ets1
interneurons	Zic1, Pou3f4, Egr1, Bclaf1, Cebpa, Sall1, Esrra, Atf2, Runx1, Hlf, Dlx2, Rorb, Rxra, Sox8, Egr4, Ets1, Dlx1, Hdac2, Arnt2, Sox2, Nr2e1, Mafb, Sox9, Dlx5, Rpp25, Maf, Mycn, Foxo1, Mef2c, Zmat4
microglia	Prdm16, Erf, Nfatc1, Cebpb, Sox8, Gtf2f1, Bclaf1, Zfp202, Mafb, Cebpa, Nfkb1, Stat6, Plagl2, Tal1, Fli1, Irf1, Cebpd, Runx1, Nfatc2, Maf, Sox10, Rel, Prdm1, Atf3, Ets1, Fos, Fosb, Egr1, Etv1, Elf1
oligodendrocytes	Creb3, Atf3, Fos, Foxo1, Ddit3, Erf, Pou3f1, Fosb, Rab14, Srebf2, Gtf2f1, Pou3f2, Nr3c1, Taf1, Hlf, Sall1, Nfe2l2, Ezh2, Egr4, Tbr1, Mef2c, Etv1, Bclaf1, Hcfc1, Ets1, Sox10, Elf1, Sox9, Egr1, Sox8
pyramidal CA1	Etv5, Usf1, Etv1, Tef, Dbp, Hcfc1, Pbx1, Cux1, Fosl2, Egr1, Bclaf1, Foxg1, Tbr1, Hdac2, Arnt2, Ikzf2, Dlx2, Parp1, Pou3f1, Dlx1, Sox8, Sox9, Smarca4, Ets1, Tead1, Neurod2, Hlf, Mef2c, Egr4, Rfx3
pyramidal SS	Rel, Zic1, Stat6, Fosl2, Etv6, Elk3, Pou3f2, Tef, Etv5, Egr1, Bclaf1, Atf2, Sox2, Tbr1, Dbp, Ets1, Fli1, Neurod2, Hdac2, Sox9, Hlf, Mef2c, Sox8, Cux1, Rfx3, Dlx1, Mkx, Egr4, Arnt2, Rora
Without Labelling TF
Cell type	TOP30 TF (from 30th to 1st)
astrocytes_ependymal	Nr3c1, Hes5, Rorb, Dbp, Pbx1, Fos, Atf3, Srebf2, Fli1, Zic1, Gtf2f1, Rfx3, Foxg1, Sox10, Stat6, Elk3, Pou3f2, Etv5, Etv1, Nfkb1, Tead1, Hlf, Sox9, Bclaf1, Hcfc1, Irf1, Mef2c, Egr1, Sox8, Ets1
endothelial-mural	Tead1, Tal1, Klf2, Yy1, Prdm1, Etv1, Erf, Jun, Gata2, Hlf, Nr3c1, Egr4, Taf1, Elk3, Nfkb1, Fos, Fosb, Bclaf1, Stat6, Sox10, Mef2c, Atf3, Hcfc1, Egr1, Elf1, Fli1, Sox9, Sox8, Irf1, Ets1
interneurons	Etv1, Dbp, Sall1, Cux1, Fli1, Pou3f4, Egr1, Atf2, Esrra, Sox8, Hdac2, Hlf, Ets1, Sox9, Sox2, Dlx2, Dlx1, Rorb, Rxra, Mafb, Egr4, Nr2e1, Arnt2, Maf, Rpp25, Dlx5, Foxo1, Mycn, Mef2c, Zmat4
microglia	Irf9, Cebpb, Irf1, Maf, Fli1, Stat6, Mafb, Plagl2, Gtf2f1, Etv1, Cebpa, Bclaf1, Runx1, Zfp202, Nfkb1, Junb, Atf3, Tal1, Rel, Taf1, Cebpd, Fos, Nr3c1, Prdm1, Nfatc2, Sox10, Egr1, Ets1, Fosb, Elf1
oligodendrocytes	Arnt2, Creb3, Pou3f1, Erf, Foxo1, Hlf, Srebf2, Sall1, Rab14, Fosb, Fos, Ddit3, Nfe2l2, Ezh2, Pou3f2, Gtf2f1, Mef2c, Taf1, Tbr1, Nr3c1, Egr4, Etv1, Bclaf1, Egr1, Hcfc1, Ets1, Elf1, Sox9, Sox10, Sox8
pyramidal CA1	Nr3c1, Elk3, Rfx1, Usf1, Etv5, Bclaf1, Atf4, Tef, Pou3f1, Fosl2, Pbx1, Etv1, Parp1, Hdac2, Arnt2, Tbr1, Dlx2, Foxg1, Sox9, Ikzf2, Smarca4, Tead1, Dlx1, Sox8, Neurod2, Ets1, Hlf, Egr4, Mef2c, Rfx3
pyramidal SS	Rel, Fosl2, Stat6, Pou3f2, Rorb, Elk3, Zic1, Nr1d1, Dlx5, Etv6, Atf2, Tbr1, Dbp, Egr1, Hdac2, Fli1, Sox2, Mkx, Ets1, Cux1, Etv5, Neurod2, Sox9, Dlx1, Sox8, Mef2c, Hlf, Egr4, Arnt2, Rfx3
